# Supplementary material
Source: HighWire-hosted journal article supplement (http://jpet.aspetjournals.org/highwire/filestream/142562/field_highwire_adjunct_files/0/248807SupplFigure.pdf)
Supplement: 248807SupplFigure.pdf [file 248807SupplFigure.pdf]

## Naringenin ameliorates radiation-induced lung injury by lowering IL-1 $\beta$ level

Chao Zhang, Wenfeng Zeng, Yi Yao, Bin Xu, Xiuli Wei, Luoyang Wang, Xiaozhe Yin, Apurba Kumar Barman, Fayun Zhang, Chunling Zhang, Qibin Song, Wei Liang

Journal of Pharmacology and Experimental Therapeutics

Supplemental Figure 1

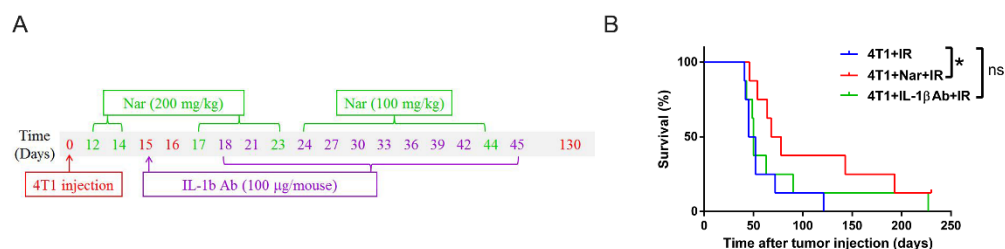

**Fig. S1. Naringenin (Nar) but not anti-IL-1 $\beta$  antibody improves the anti-tumor efficacy of radiotherapy.** A lung metastasis model was established by intravenously injecting  $5 \times 10^5$  4T1 mouse breast cancer cells in female Balb/c mice (8-week-old), which was used to evaluate the efficacy of radiotherapy combined with either Nar or anti-IL-1 $\beta$  antibody. 14 days after 4T1 cells injection, Balb/c mice will 100% develop lung metastasis. The cancer-bearing mice were exposed to 8 Gy  $\times$  2 f thoracic irradiation (IR), and mouse anti-IL-1 $\beta$  antibody (i.p.) or naringenin (oral) was given as schematic represented in Fig. S1A. survival curve of tumor-bearing mice was shown in Fig. S1B. \*  $p < 0.05$ , ns means non-significant difference.
